# Supplementary material for: Unravelling the solvent polarity effect on the excited state intramolecular proton transfer mechanism of the 1- and 2-salicylideneanthrylamine. A TD-DFT case study
Source: Royal Society of Chemistry journal article supplement (doi:10.1039/c8cp06298f), 2018-12-10
Supplement: c8cp06298f1.pdf [file c8cp06298f1.pdf]

**Unravelling the solvent polarity effect on the excited state intramolecular proton *transfer* mechanism of the 1- and 2-salicylideneanthrylamine. A TD-DFT case study.**

Wilver A. Muriel,<sup>a</sup> Rodrigo Morales Cueto,<sup>b</sup> and William Rodríguez-Córdoba\*<sup>a</sup>

<sup>a</sup> Universidad Nacional de Colombia – Sede Medellín, Facultad de ciencias, Escuela de Física,  
Laboratorio de Fotónica y Optoelectrónica, Calle 59 A No 63-20, A.A. 3840, Medellín, Colombia

<sup>b</sup> Centro de Investigaciones Químicas, Instituto de Investigación en Ciencias Básicas y Aplicadas,  
Universidad Autónoma del Estado de Morelos, 62209 Cuernavaca Morelos, México.

**Electronic Supplementary Material**

## List of contents:

**Fig. S1** Ground state optimized structures of the rotamers and tautomers of 1-AntSA in acetonitrile calculated at the PCM/B3LYP/6-311+G(d,p) level of theory. Ground state relative energies are referred to **1**.

**Fig. S2** Ground state optimized structures of the rotamers and tautomers of 1-AntSA in acetonitrile calculated at the PCM/B3LYP/6-311+G(d,p) level of theory. Ground state relative energies are referred to **1'**.

**Fig. S3** Ground state optimized structures of the different rotamers and tautomers of 1-AntSA in methanol calculated at the PCM/B3LYP/6-311+G(d,p) level of theory. Ground state relative energies are referred to **1**. Intramolecular hydrogen bond distance in Å and torsional angles in degrees ( $\phi_1, \phi_2, \phi_3$ ).

**Fig. S4** Ground state optimized structures of the different rotamers and tautomers of 2-AntSA in methanol calculated at the PCM/B3LYP/6-311+G(d,p) level of theory. Ground state relative energies are referred to **1'**. Intramolecular hydrogen bond distance in Å and torsional angles in degrees ( $\phi_1, \phi_2, \phi_3$ ).

**Fig. S5** Ground state optimized structures of the different rotamers and tautomers of 1-AntSA in cyclohexane calculated at the PCM/B3LYP/6-311+G(d,p) level of theory. Ground state relative energies are referred to **1**. Intramolecular hydrogen bond distance in Å and torsional angles in degrees ( $\phi_1, \phi_2, \phi_3$ ).

**Fig. S6** Ground state optimized structures of the different rotamers and tautomers of 2-AntSA in cyclohexane calculated at the PCM/B3LYP/6-311+G(d,p) level of theory. Ground state relative energies are referred to **1'**. Intramolecular hydrogen bond distance in Å and torsional angles in degrees ( $\phi_1, \phi_2, \phi_3$ ).

**Fig. S7** Isosurfaces of the frontier Kohn-Sham orbitals of (B) *trans*-enol **4** and *cis*-keto **5**, and (C) *trans*-enol **1'** and *cis*-keto **2'** in acetonitrile calculated at the PCM/TD/CAM-B3LYP/6-311+G(d,p) level of theory.

**Fig. S8** Isosurfaces of the frontier Kohn-Sham orbitals of (A) *trans*-enol **1** and *cis*-keto **2**, (B) *trans*-enol **4** and *cis*-keto **5**, (C) *trans*-enol **1'** and *cis*-keto **2'** and (D) *trans*-enol **4'** and *cis*-keto **5'** in methanol calculated at the PCM/TD/CAM-B3LYP/6-311+G(d,p) level of theory.

**Fig. S9** Isosurfaces of the frontier Kohn-Sham orbitals of (A) *trans*-enol **1** and *cis*-keto **2**, (B) *trans*-enol **4** and *cis*-keto **5**, (C) *trans*-enol **1'** and *cis*-keto **2'** and (D) *trans*-enol **4'** and *cis*-keto **5'** in cyclohexane calculated at the PCM/TD/CAM-B3LYP/6-311+G(d,p) level of theory.

**Fig. S10** Optimized structures of the *trans*-enol (**(1)S<sub>1</sub>**, **(4)S<sub>1</sub>**), twisted-enol (**(1)S<sub>1-Tw</sub>**, **(4)S<sub>1-Tw</sub>**), *cis*-keto (**(2)S<sub>1</sub>**, **(5)S<sub>1</sub>**), twisted-keto (**(2)S<sub>1-Tw</sub>**, **(5)S<sub>1-Tw</sub>**) and *trans*-keto (**(3)S<sub>1</sub>**, **(6)S<sub>1</sub>**) forms of 1-AntSA in the S<sub>1</sub> state in methanol. The energies are relative to the more stable forms **(1)S<sub>1-Tw</sub>** and **(4)S<sub>1</sub>**, respectively.

**Fig. S11** Optimized structures of the *trans*-enol (**(1')S<sub>1</sub>**, **(4')S<sub>1</sub>**), twisted-enol (**(1')S<sub>1-Tw</sub>**, **(4')S<sub>1-Tw</sub>**), *cis*-keto (**(2')S<sub>1</sub>**, **(5')S<sub>1</sub>**), twisted-keto (**(2')S<sub>1-Tw</sub>**, **(5')S<sub>1-Tw</sub>**) and *trans*-keto (**(3')S<sub>1</sub>**, **(6')S<sub>1</sub>**) forms of 2-AntSA in the S<sub>1</sub> state in methanol. The energies are relative to the more stable forms **(2')S<sub>1</sub>** and **(5')S<sub>1</sub>**, respectively.

**Fig. S12** Optimized structures of the *trans*-enol (**(1)S<sub>1</sub>**, **(4)S<sub>1</sub>**), twisted-enol (**(1)S<sub>1-Tw</sub>**, **(4)S<sub>1-Tw</sub>**), *cis*-keto (**(2)S<sub>1</sub>**, **(5)S<sub>1</sub>**), twisted-keto (**(2)S<sub>1-Tw</sub>**, **(5)S<sub>1-Tw</sub>**) and *trans*-keto (**(3)S<sub>1</sub>**, **(6)S<sub>1</sub>**) forms of 1-AntSA in the S<sub>1</sub> state in cyclohexane. The energies are relative to the more stable forms **(1)S<sub>1-Tw</sub>** and **(4)S<sub>1-Tw</sub>**, respectively.

**Fig. S13** Optimized structures of the *trans*-enol ((1')S<sub>1</sub>, (4')S<sub>1</sub>), twisted-enol ((1')S<sub>1-Tw</sub>, (4')S<sub>1-Tw</sub>), *cis*-keto ((2')S<sub>1</sub>, (5')S<sub>1</sub>), twisted-keto ((2')S<sub>1-Tw</sub>, (5')S<sub>1-Tw</sub>) and *trans*-keto ((3')S<sub>1</sub>, (6')S<sub>1</sub>) forms of 2-AntSA in the S<sub>1</sub> state in cyclohexane. The energies are relative to the more stable forms (1')S<sub>1-Tw</sub> and (4')S<sub>1-Tw</sub>, respectively.

**Table S1.** Selected parameters of the optimized *trans*-enol ((1)S<sub>1</sub>, (1')S<sub>1</sub>), *cis*-keto ((2)S<sub>1</sub>, (2')S<sub>1</sub>) and *trans*-keto ((2)S<sub>1-Tw</sub>, (2')S<sub>1-Tw</sub>) forms in the S<sub>0</sub> and S<sub>1</sub> states.

**Table S2** Excitation energies (eV), oscillator strengths *f* and largest excitation coefficients for the *trans*-enol, *cis*-keto and *trans*-keto forms of 1-AntSA and 2-AntSA in **A** methanol and **B** cyclohexane computed at the PCM/TD/CAM-B3LYP/6-311+G(d,p) level of theory.

**Table S3.** TD-DFT first excited states relative energies (RE, kcal/mol), intramolecular hydrogen bond (IMHB, Å) and torsional angles (φ<sub>*i*</sub>, degrees) of the *trans*-enol ((1)S<sub>1</sub>, (1')S<sub>1</sub>), twisted-enol ((1)S<sub>1-Tw</sub>, (1')S<sub>1-Tw</sub>), *cis*-keto ((2)S<sub>1</sub>, (2')S<sub>1</sub>), twisted-keto ((2)S<sub>1-Tw</sub>, (2')S<sub>1-Tw</sub>) and *trans*-keto ((3)S<sub>1</sub>, (3')S<sub>1</sub>) forms.

**Fig. S1** Ground state optimized structures of the rotamers and tautomers of 1-AntSA in acetonitrile calculated at the PCM/B3LYP/6-311+G(d,p) level of theory. Ground state relative energies are referred to **1**.

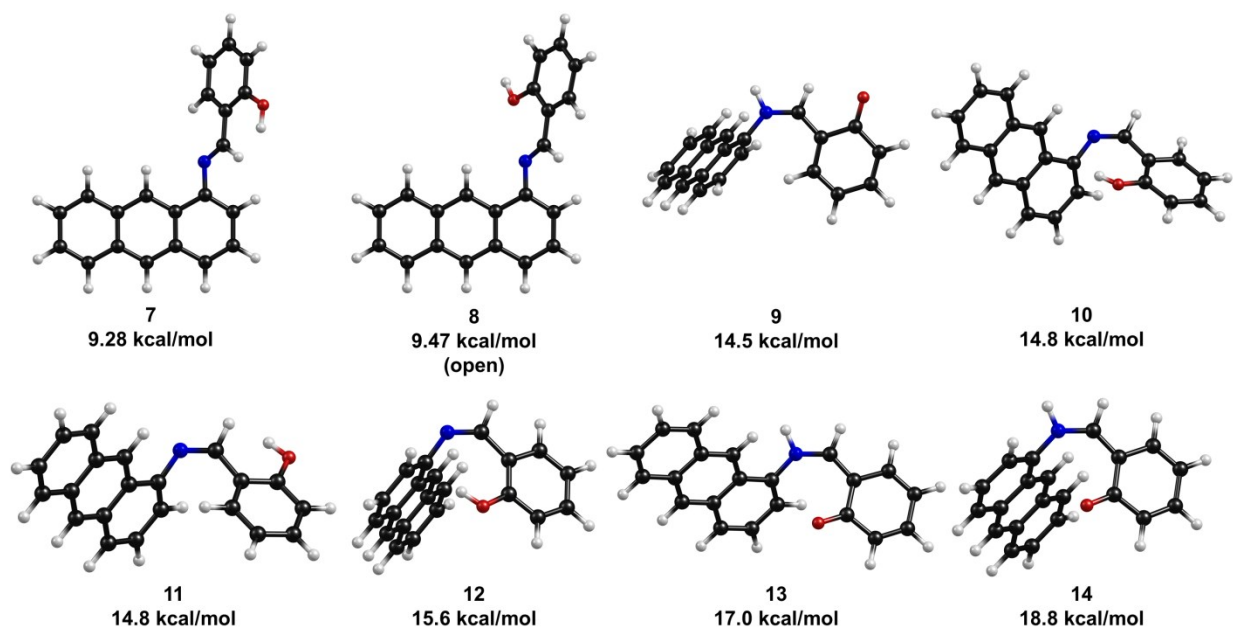

**Fig. S2** Ground state optimized structures of the rotamers and tautomers of 1-AntSA in acetonitrile calculated at the PCM/B3LYP/6-311+G(d,p) level of theory. Ground state relative energies are referred to **1'**.

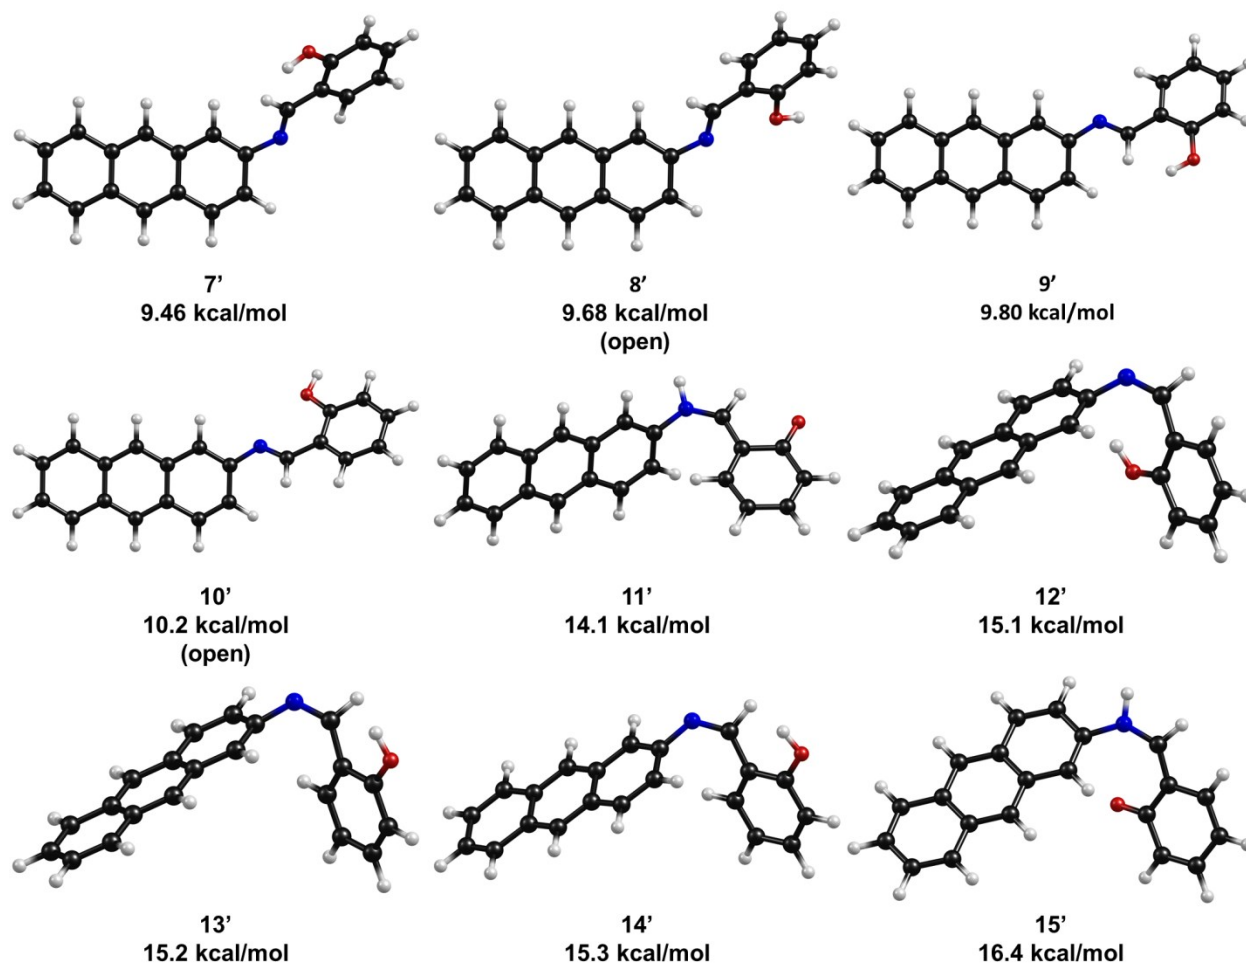

**Fig. S3** Ground state optimized structures of the different rotamers and tautomers of 1-AntSA in methanol calculated at the PCM/B3LYP/6-311+G(d,p) level of theory. Ground state relative energies are referred to **1**. Intramolecular hydrogen bond distance in Å and torsional angles in degrees ( $\phi_1$ ,  $\phi_2$ ,  $\phi_3$ ).

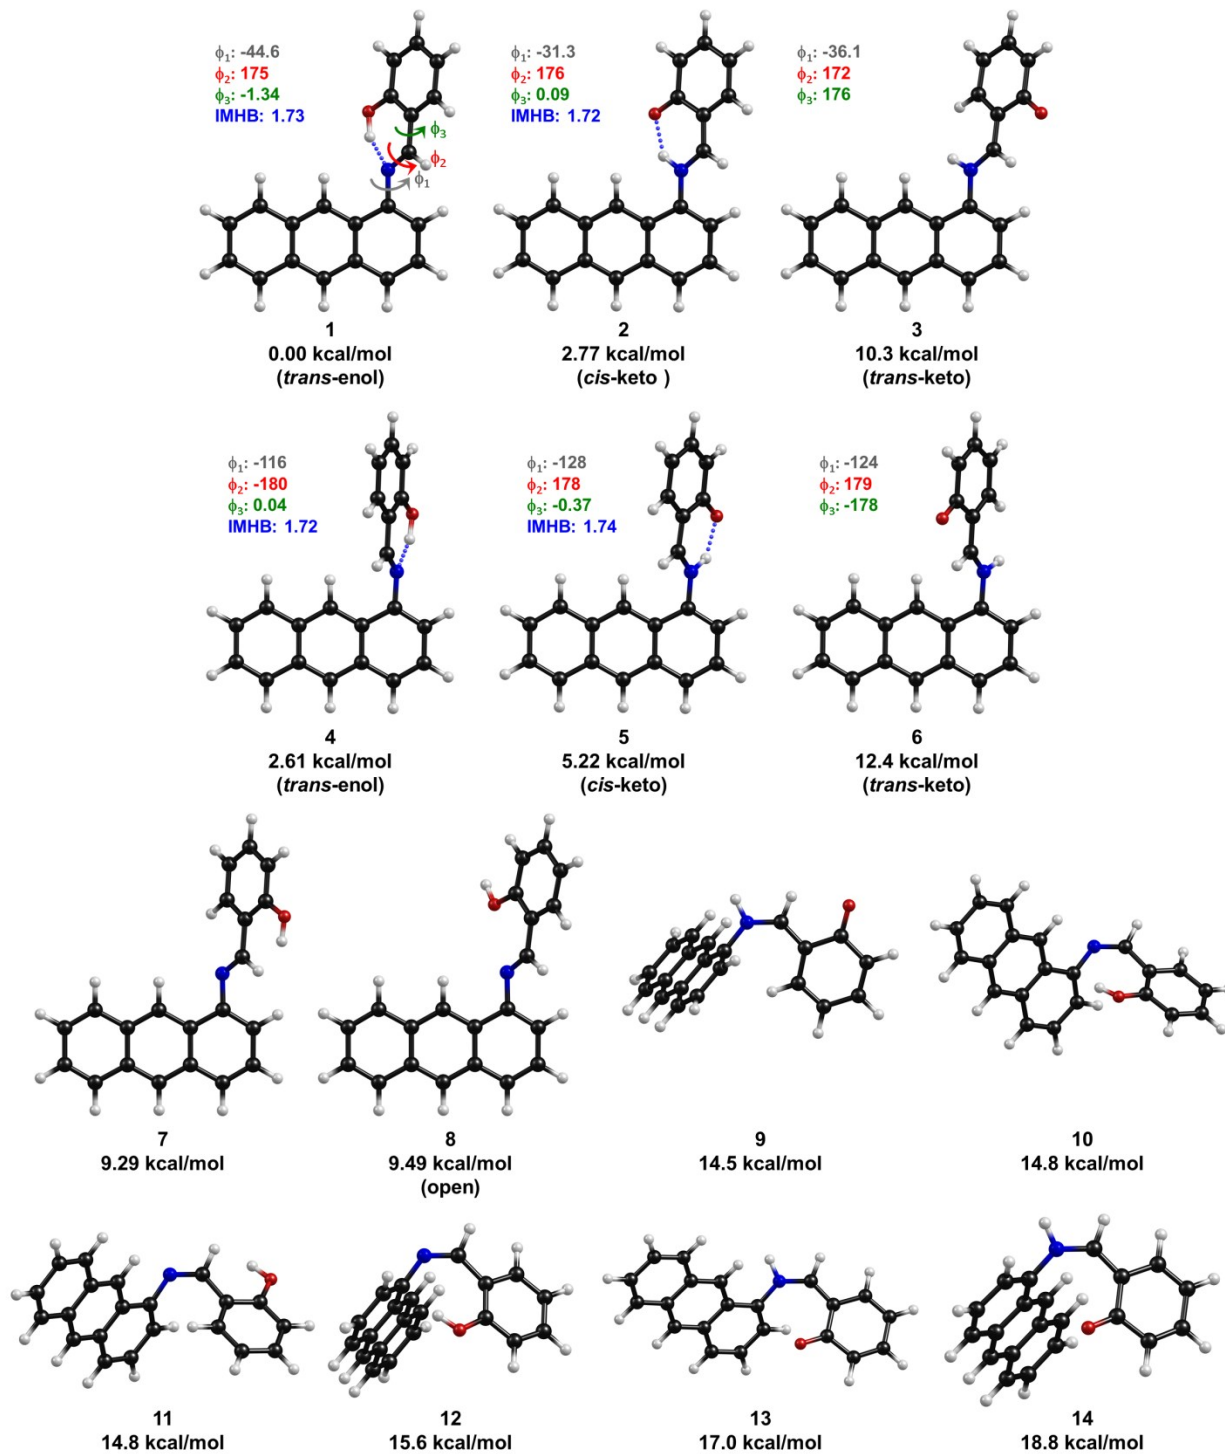

**Fig. S4** Ground state optimized structures of the different rotamers and tautomers of 2-AntSA in methanol calculated at the PCM/B3LYP/6-311+G(d,p) level of theory. Ground state relative energies are referred to **1'**. Intramolecular hydrogen bond distance in Å and torsional angles in degrees ( $\phi_1$ ,  $\phi_2$ ,  $\phi_3$ ).

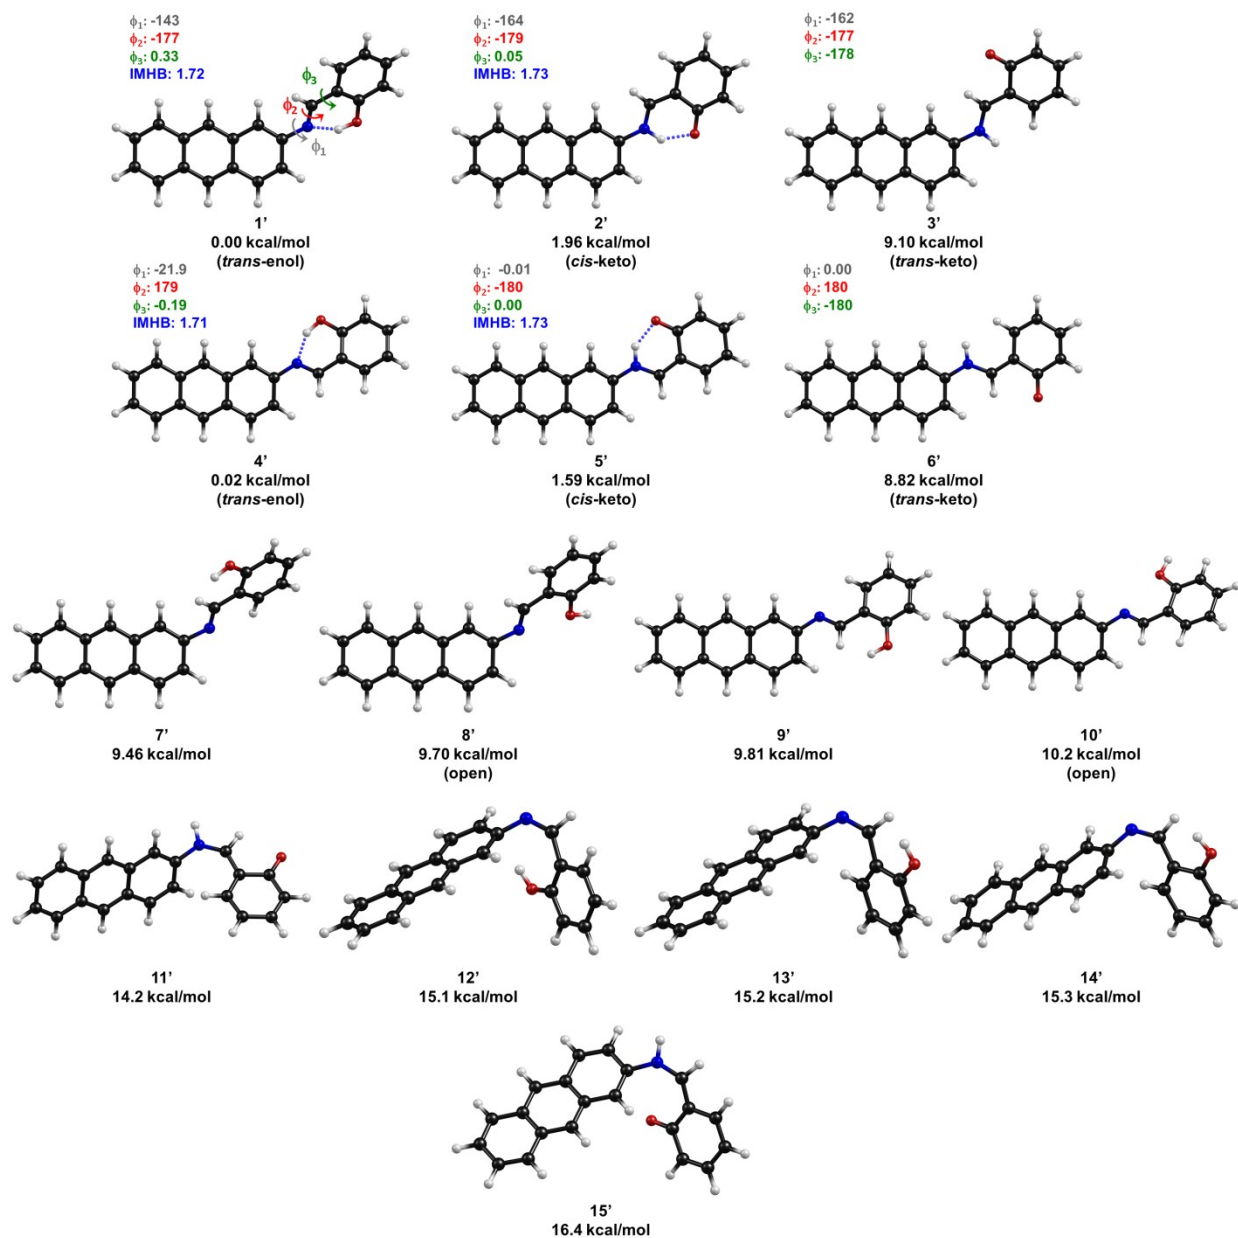

**Fig. S5** Ground state optimized structures of the different rotamers and tautomers of 1-AntSA in cyclohexane calculated at the PCM/B3LYP/6-311+G(d,p) level of theory. Ground state relative energies are referred to **1**. Intramolecular hydrogen bond distance in Å and torsional angles in degrees ( $\phi_1$ ,  $\phi_2$ ,  $\phi_3$ ).

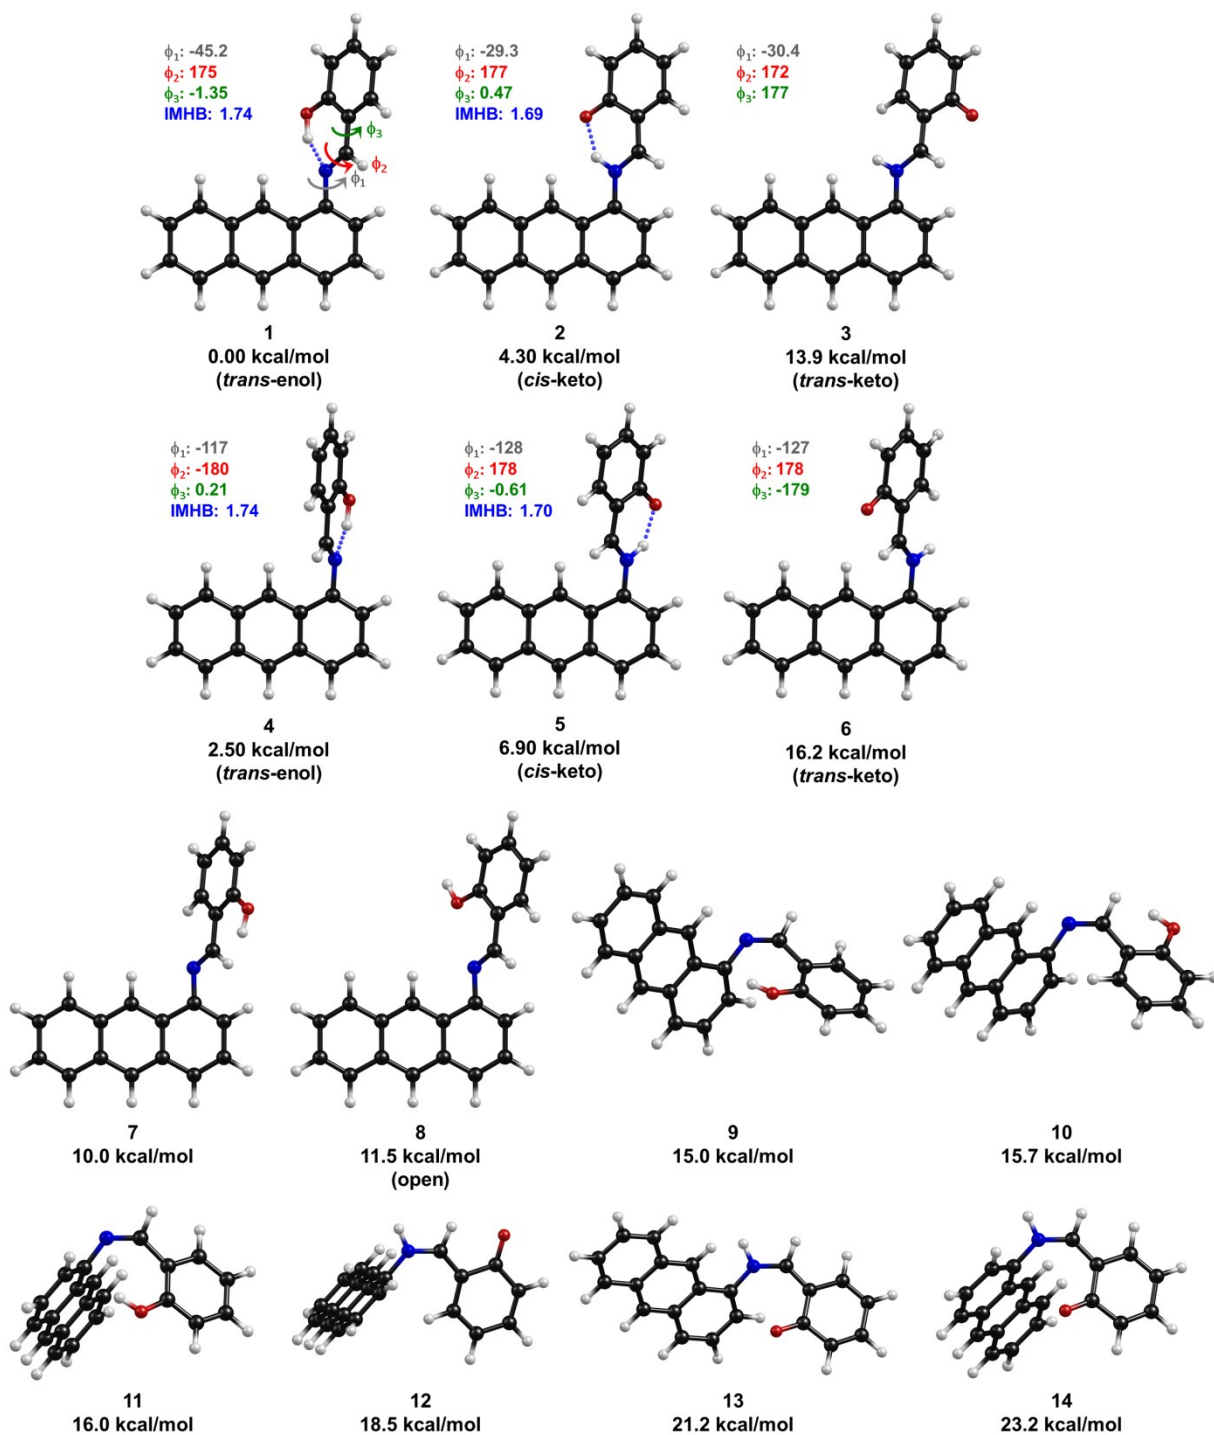



**Fig. S6** Ground state optimized structures of the different rotamers and tautomers of 2-AntSA in cyclohexane calculated at the PCM/B3LYP/6-311+G(d,p) level of theory. Ground state relative energies are referred to **1'**. Intramolecular hydrogen bond distance in Å and torsional angles in degrees ( $\phi_1$ ,  $\phi_2$ ,  $\phi_3$ ).

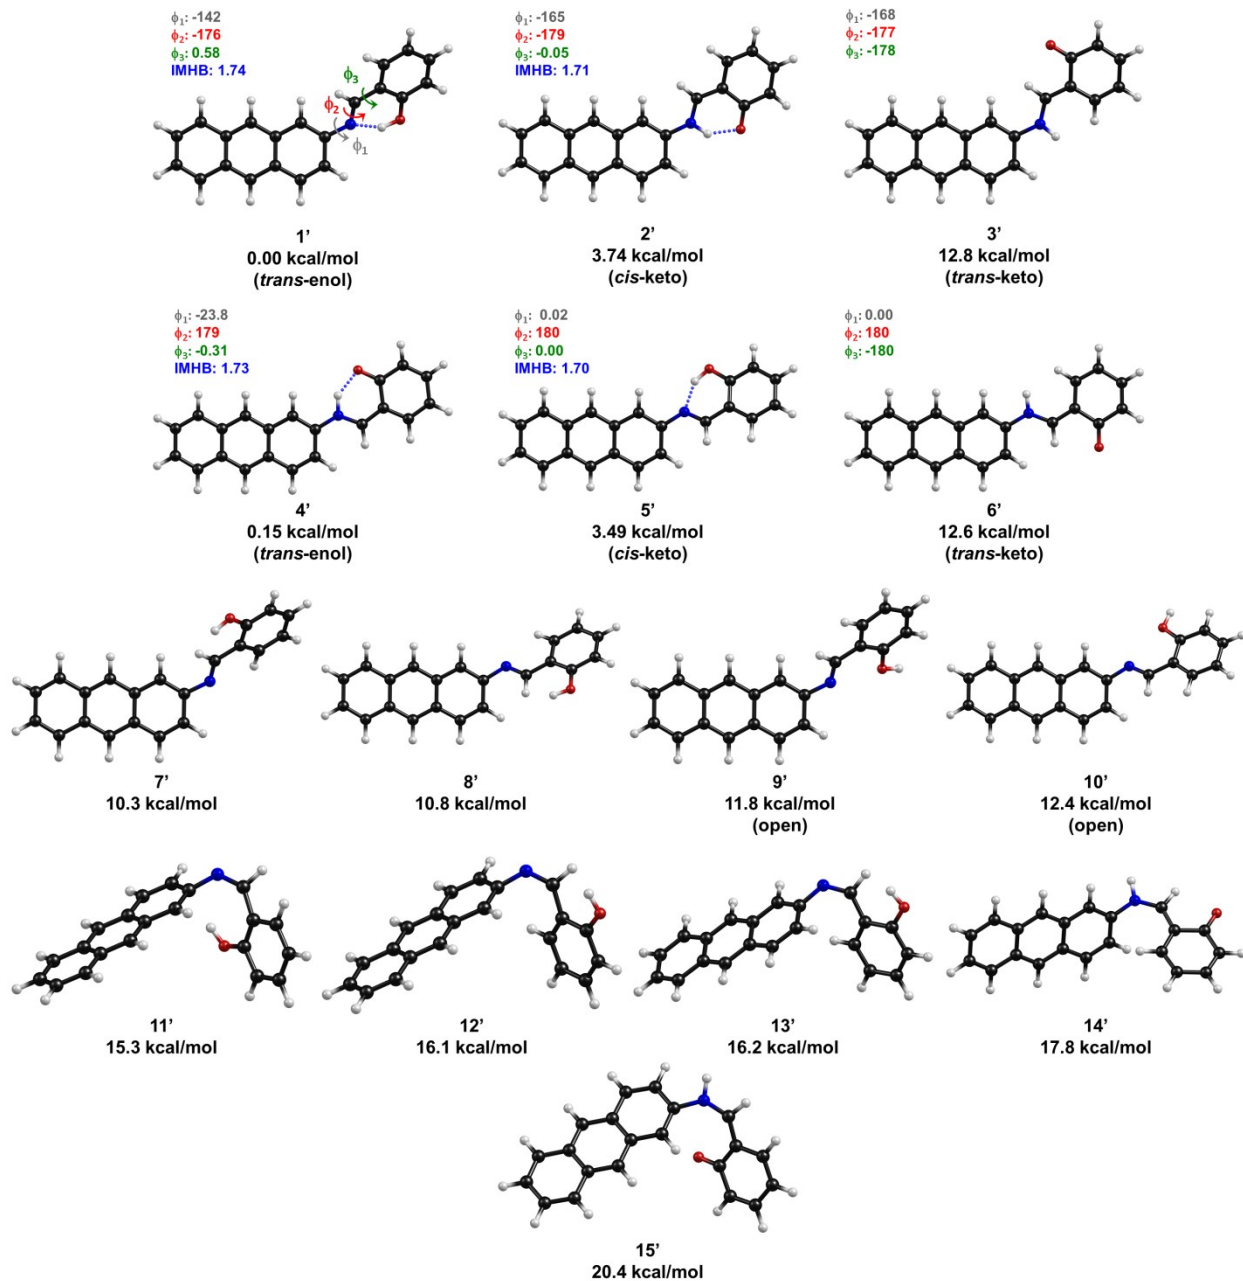

**Fig. S7** Isosurfaces of the frontier Kohn-Sham orbitals of (B) *trans*-enol **4** and *cis*-keto **5**, and (C) *trans*-enol **1'** and *cis*-keto **2'** in acetonitrile calculated at the PCM/TD/CAM-B3LYP/6-311+G(d,p) level of theory.

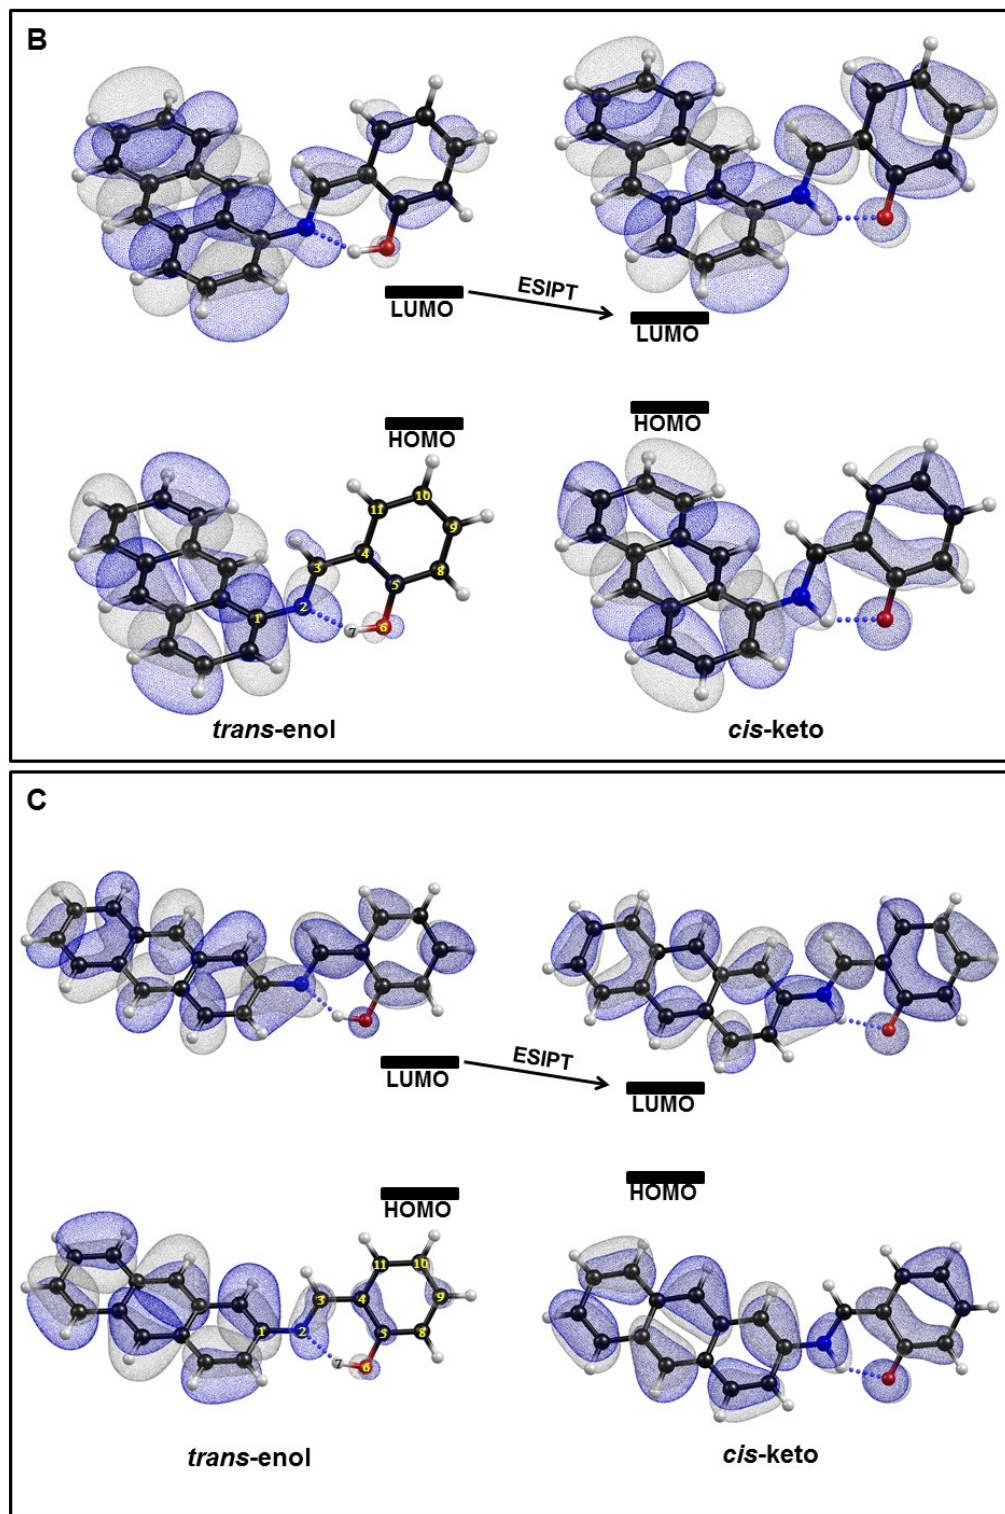

**Fig. S8** Isosurfaces of the frontier Kohn-Sham orbitals of (A) *trans*-enol **1** and *cis*-keto **2**, (B) *trans*-enol **4** and *cis*-keto **5**, (C) *trans*-enol **1'** and *cis*-keto **2'** and (D) *trans*-enol **4'** and *cis*-keto **5'** in methanol calculated at the PCM/TD/CAM-B3LYP/6-311+G(d,p) level of theory.

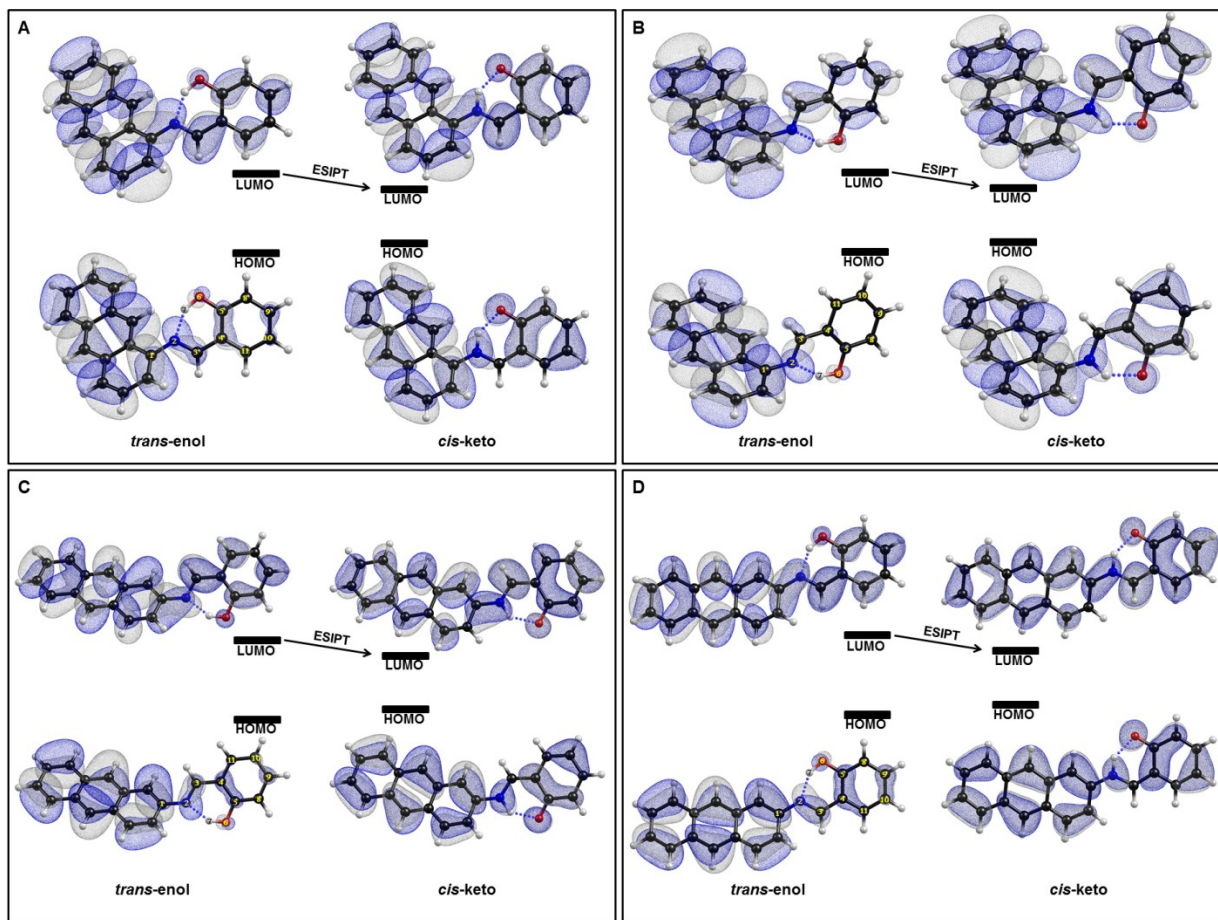

**Fig. S9** Isosurfaces of the frontier Kohn-Sham orbitals of (A) *trans*-enol **1** and *cis*-keto **2**, (B) *trans*-enol **4** and *cis*-keto **5**, (C) *trans*-enol **1'** and *cis*-keto **2'** and (D) *trans*-enol **4'** and *cis*-keto **5'** in cyclohexane calculated at the PCM/TD/CAM-B3LYP/6-311+G(d,p) level of theory.

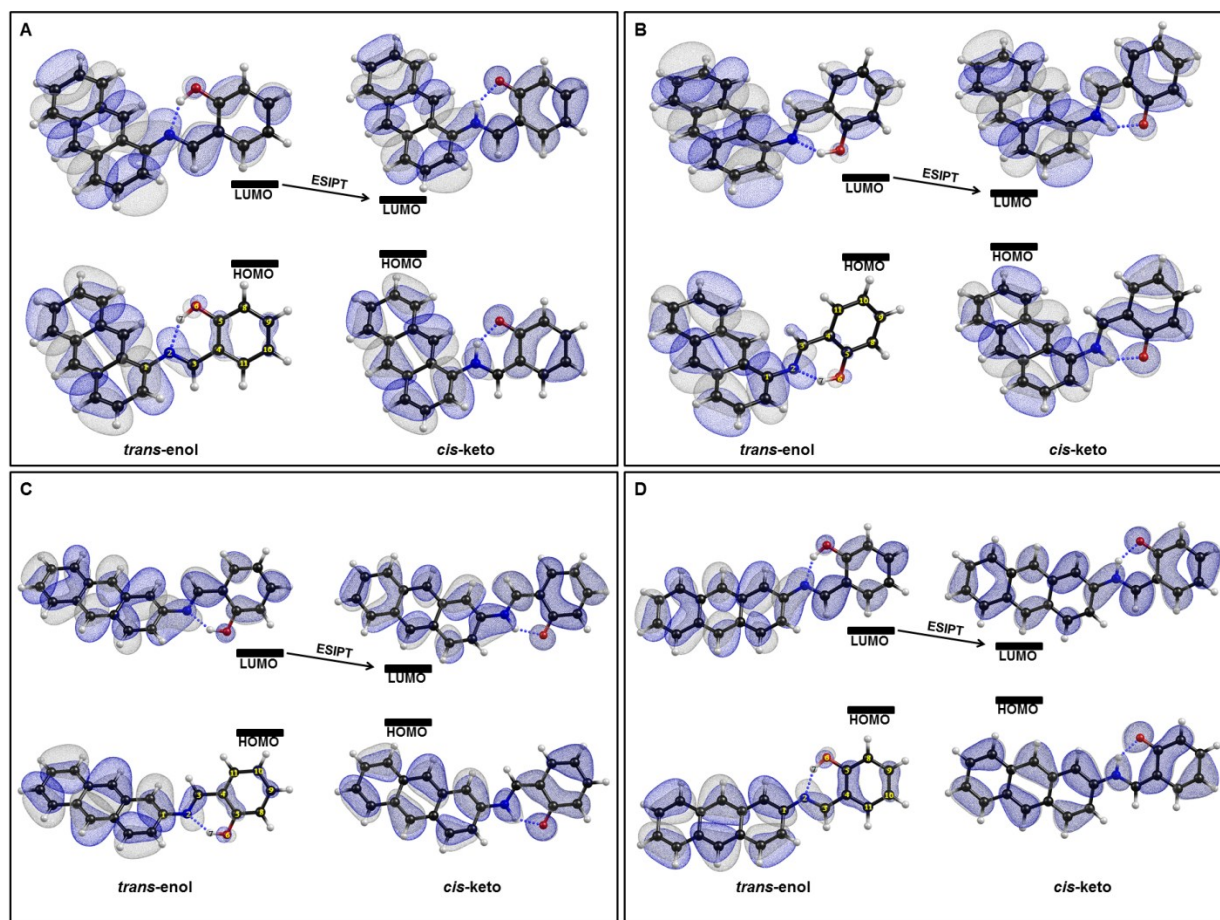

**Fig. S10** Optimized structures of the *trans*-enol ((1) $S_1$ , (4) $S_1$ ), twisted-enol ((1) $S_{1-Tw}$ , (4) $S_{1-Tw}$ ), *cis*-keto ((2) $S_1$ , (5) $S_1$ ), twisted-keto ((2) $S_{1-Tw}$ , (5) $S_{1-Tw}$ ) and *trans*-keto ((3) $S_1$ , (6) $S_1$ ) forms of 1-AntSA in the  $S_1$  state in methanol. The energies are relative to the more stable forms (1) $S_{1-Tw}$  and (4) $S_1$ , respectively.

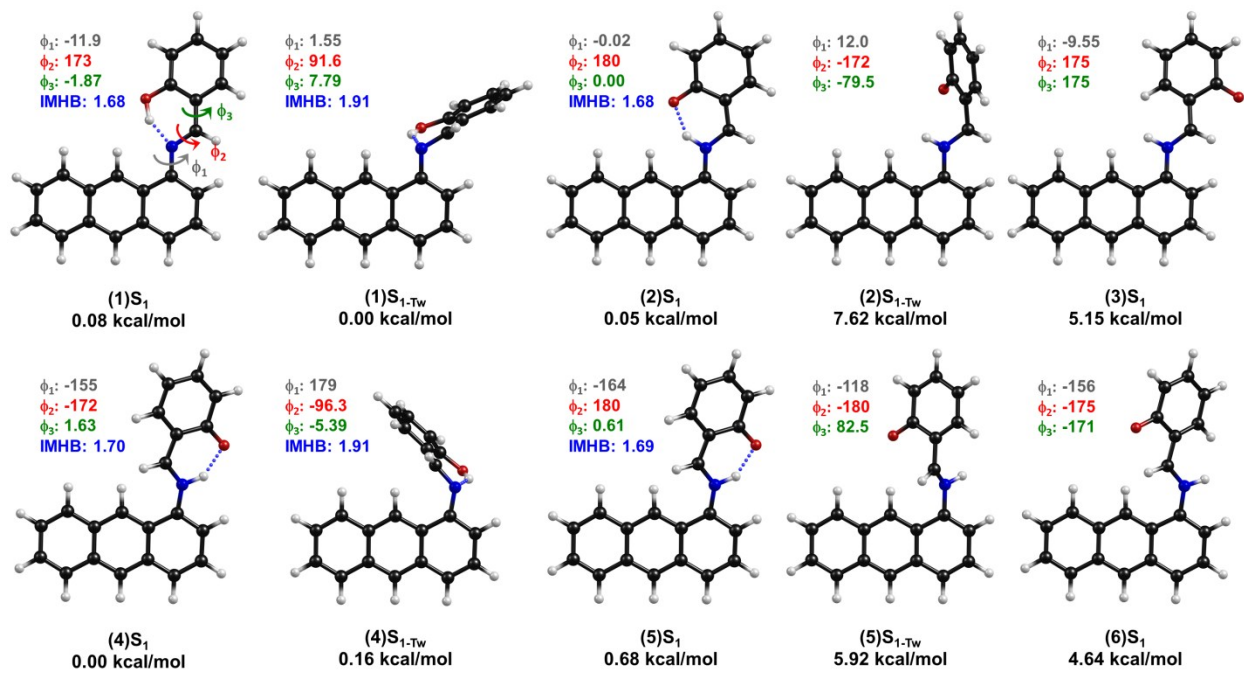

**Fig. S11** Optimized structures of the *trans*-enol ((1')S<sub>1</sub>, (4')S<sub>1</sub>), twisted-enol ((1')S<sub>1-Tw</sub>, (4')S<sub>1-Tw</sub>), *cis*-keto ((2')S<sub>1</sub>, (5')S<sub>1</sub>), twisted-keto ((2')S<sub>1-Tw</sub>, (5')S<sub>1-Tw</sub>) and *trans*-keto ((3')S<sub>1</sub>, (6')S<sub>1</sub>) forms of 2-AntSA in the S<sub>1</sub> state in methanol. The energies are relative to the more stable forms (2')S<sub>1</sub> and (5')S<sub>1</sub>, respectively.

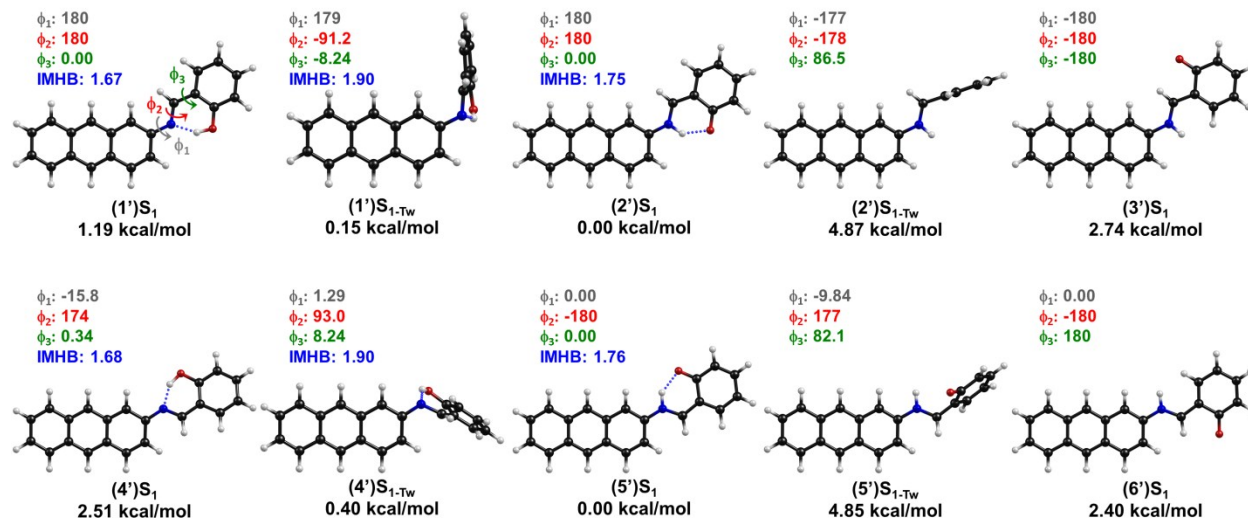

**Fig. S12** Optimized structures of the *trans*-enol ((1) $S_1$ , (4) $S_1$ ), twisted-enol ((1) $S_{1-Tw}$ , (4) $S_{1-Tw}$ ), *cis*-keto ((2) $S_1$ , (5) $S_1$ ), twisted-keto ((2) $S_{1-Tw}$ , (5) $S_{1-Tw}$ ) and *trans*-keto ((3) $S_1$ , (6) $S_1$ ) forms of 1-AntSA in the  $S_1$  state in cyclohexane. The energies are relative to the more stable forms (1) $S_{1-Tw}$  and (4) $S_{1-Tw}$ , respectively.

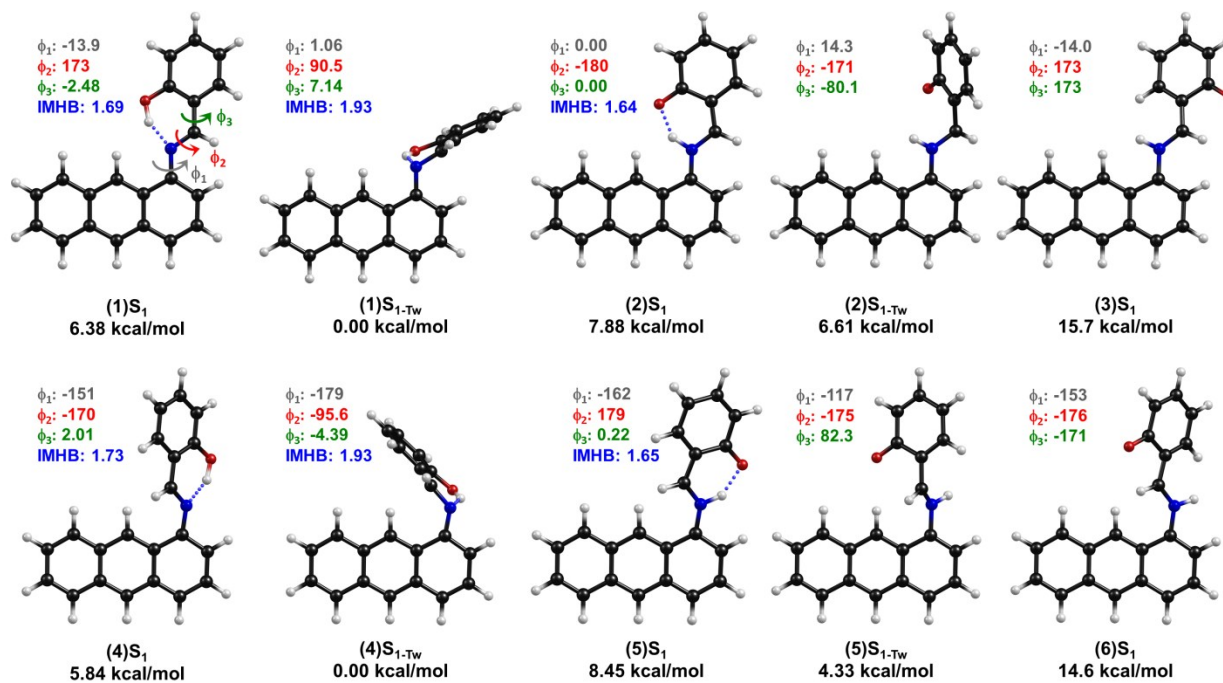

**Fig. S13** Optimized structures of the *trans*-enol ((1')S<sub>1</sub>, (4')S<sub>1</sub>), twisted-enol ((1')S<sub>1-Tw</sub>, (4')S<sub>1-Tw</sub>), *cis*-keto ((2')S<sub>1</sub>, (5')S<sub>1</sub>), twisted-keto ((2')S<sub>1-Tw</sub>, (5')S<sub>1-Tw</sub>) and *trans*-keto ((3')S<sub>1</sub>, (6')S<sub>1</sub>) forms of 2-AntSA in the S<sub>1</sub> state in cyclohexane. The energies are relative to the more stable forms (1')S<sub>1-Tw</sub> and (4')S<sub>1-Tw</sub>, respectively.

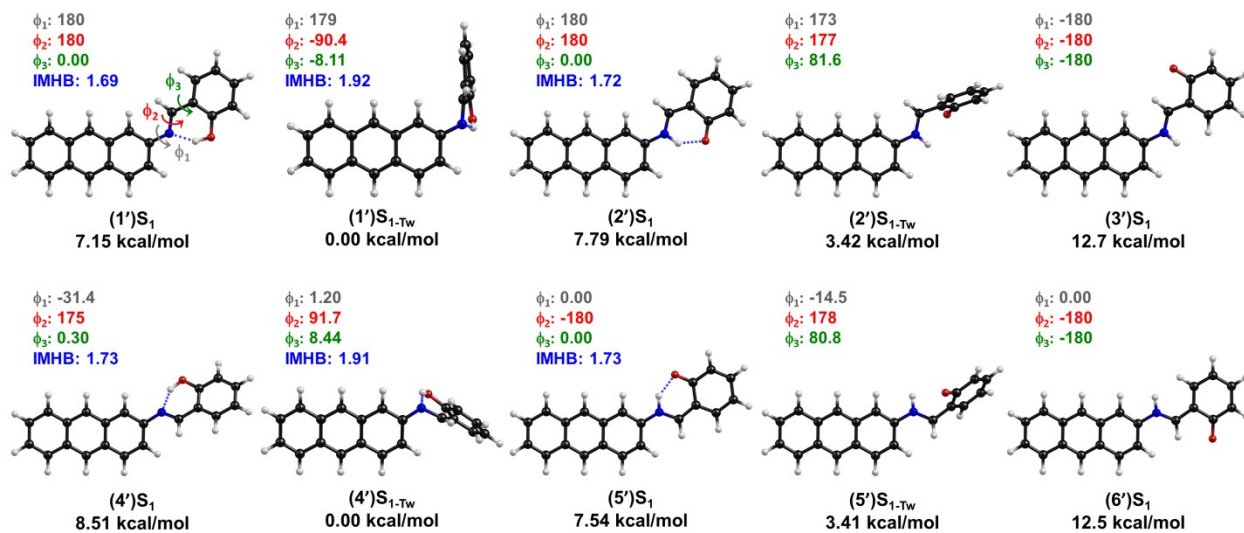





|                                  |                   |                          |                 |                          |                   |                          |                   |                          |                 |                          |                   |                          |
|----------------------------------|-------------------|--------------------------|-----------------|--------------------------|-------------------|--------------------------|-------------------|--------------------------|-----------------|--------------------------|-------------------|--------------------------|
| $\phi_1$                         | -44.63            | -11.91                   | -31.30          | -0.02                    | -36.08            | -9.553                   | -115.9            | -155.2                   | -127.7          | -163.8                   | -124.0            | -156.1                   |
| $\phi_2$                         | 175.2             | 173.1                    | 176.2           | 180.0                    | 172.2             | 174.6                    | -179.8            | -171.6                   | 178.2           | 180.0                    | 179.2             | -175.3                   |
| $\phi_3$                         | -1.341            | -1.866                   | 0.091           | 0.003                    | 175.9             | 175.4                    | 0.038             | 1.628                    | -0.368          | 0.614                    | -177.9            | -170.7                   |
| <b>Cyclohexane</b>               |                   |                          |                 |                          |                   |                          |                   |                          |                 |                          |                   |                          |
|                                  | <i>trans-enol</i> |                          | <i>cis-keto</i> |                          | <i>trans-keto</i> |                          | <i>trans-enol</i> |                          | <i>cis-keto</i> |                          | <i>trans-keto</i> |                          |
| <b>Structural parameters</b>     | <b>1</b>          | <b>(1)S<sub>1</sub></b>  | <b>2</b>        | <b>(2)S<sub>1</sub></b>  | <b>3</b>          | <b>(3)S<sub>1</sub></b>  | <b>4</b>          | <b>(4)S<sub>1</sub></b>  | <b>5</b>        | <b>(5)S<sub>1</sub></b>  | <b>6</b>          | <b>(6)S<sub>1</sub></b>  |
| C <sub>1</sub> -N <sub>2</sub>   | 1.405             | 1.348                    | 1.409           | 1.350                    | 1.414             | 1.382                    | 1.414             | 1.349                    | 1.421           | 1.361                    | 1.427             | 1.386                    |
| N <sub>2</sub> -C <sub>3</sub>   | 1.289             | 1.325                    | 1.328           | 1.352                    | 1.343             | 1.342                    | 1.286             | 1.317                    | 1.327           | 1.346                    | 1.343             | 1.344                    |
| C <sub>3</sub> -C <sub>4</sub>   | 1.450             | 1.425                    | 1.399           | 1.405                    | 1.383             | 1.416                    | 1.452             | 1.427                    | 1.400           | 1.409                    | 1.384             | 1.417                    |
| C <sub>4</sub> -C <sub>5</sub>   | 1.420             | 1.424                    | 1.465           | 1.469                    | 1.485             | 1.473                    | 1.420             | 1.422                    | 1.464           | 1.469                    | 1.484             | 1.473                    |
| C <sub>5</sub> -C <sub>8</sub>   | 1.399             | 1.391                    | 1.439           | 1.428                    | 1.459             | 1.424                    | 1.400             | 1.391                    | 1.440           | 1.430                    | 1.459             | 1.424                    |
| C <sub>8</sub> -C <sub>9</sub>   | 1.388             | 1.383                    | 1.370           | 1.370                    | 1.360             | 1.387                    | 1.388             | 1.384                    | 1.369           | 1.370                    | 1.360             | 1.387                    |
| C <sub>9</sub> -C <sub>10</sub>  | 1.401             | 1.400                    | 1.425           | 1.414                    | 1.436             | 1.394                    | 1.401             | 1.399                    | 1.425           | 1.413                    | 1.435             | 1.394                    |
| C <sub>10</sub> -C <sub>11</sub> | 1.385             | 1.375                    | 1.368           | 1.373                    | 1.361             | 1.403                    | 1.385             | 1.376                    | 1.368           | 1.375                    | 1.361             | 1.403                    |
| C <sub>11</sub> -C <sub>4</sub>  | 1.408             | 1.412                    | 1.427           | 1.413                    | 1.435             | 1.390                    | 1.407             | 1.411                    | 1.427           | 1.410                    | 1.435             | 1.391                    |
| C <sub>5</sub> -O <sub>6</sub>   | 1.345             | 1.339                    | 1.267           | 1.268                    | 1.242             | 1.254                    | 1.344             | 1.341                    | 1.266           | 1.264                    | 1.242             | 1.254                    |
| O <sub>6</sub> -H <sub>7</sub>   | 0.993             | 0.997                    | 1.689           | 1.639                    | ----              | ----                     | 0.994             | 0.991                    | 1.703           | 1.654                    | ----              | ----                     |
| N <sub>2</sub> -H <sub>7</sub>   | 1.743             | 1.689                    | 1.043           | 1.047                    | 1.011             |                          | 1.740             | 1.732                    | 1.043           | 1.048                    | 1.011             | 1.014                    |
| $\phi_1$                         | -45.21            | -13.90                   | -29.27          | 0.001                    | -30.38            | -14.00                   | -116.7            | -151.1                   | -128.1          | -162.1                   | -127.0            | -152.6                   |
| $\phi_2$                         | 175.3             | 172.8                    | 176.9           | -180.0                   | 171.9             | 173.4                    | -179.6            | -170.8                   | 177.8           | 178.8                    | 178.0             | -176.2                   |
| $\phi_3$                         | -1.345            | -2.480                   | 0.476           | 0.002                    | 176.8             | 172.9                    | 0.209             | 2.009                    | -0.610          | 0.222                    | -179.1            | -171.3                   |
| <b>2-AntSA</b>                   |                   |                          |                 |                          |                   |                          |                   |                          |                 |                          |                   |                          |
| <b>Acetonitrile</b>              |                   |                          |                 |                          |                   |                          |                   |                          |                 |                          |                   |                          |
|                                  | <i>trans-enol</i> |                          | <i>cis-keto</i> |                          | <i>trans-keto</i> |                          | <i>trans-enol</i> |                          | <i>cis-keto</i> |                          | <i>trans-keto</i> |                          |
| <b>Structural parameters</b>     | <b>1'</b>         | <b>(1')S<sub>1</sub></b> | <b>2'</b>       | <b>(2')S<sub>1</sub></b> | <b>3'</b>         | <b>(3')S<sub>1</sub></b> | <b>4'</b>         | <b>(4')S<sub>1</sub></b> | <b>5'</b>       | <b>(5')S<sub>1</sub></b> | <b>6'</b>         | <b>(6')S<sub>1</sub></b> |
| C <sub>1</sub> -N <sub>2</sub>   | 1.407             | 1.350                    | 1.408           | 1.355                    | 1.414             | 1.377                    | 1.406             | 1.355                    | 1.408           | 1.358                    | 1.412             | 1.379                    |
| N <sub>2</sub> -C <sub>3</sub>   | 1.289             | 1.327                    | 1.325           | 1.352                    | 1.334             | 1.345                    | 1.291             | 1.318                    | 1.325           | 1.351                    | 1.333             | 1.346                    |
| C <sub>3</sub> -C <sub>4</sub>   | 1.451             | 1.425                    | 1.405           | 1.411                    | 1.390             | 1.417                    | 1.451             | 1.427                    | 1.405           | 1.414                    | 1.392             | 1.418                    |
| C <sub>4</sub> -C <sub>5</sub>   | 1.420             | 1.426                    | 1.461           | 1.473                    | 1.478             | 1.476                    | 1.420             | 1.425                    | 1.461           | 1.477                    | 1.477             | 1.477                    |
| C <sub>5</sub> -C <sub>8</sub>   | 1.399             | 1.392                    | 1.437           | 1.428                    | 1.453             | 1.424                    | 1.399             | 1.392                    | 1.437           | 1.426                    | 1.452             | 1.422                    |
| C <sub>8</sub> -C <sub>9</sub>   | 1.389             | 1.384                    | 1.373           | 1.374                    | 1.364             | 1.385                    | 1.389             | 1.384                    | 1.373           | 1.378                    | 1.365             | 1.389                    |
| C <sub>9</sub> -C <sub>10</sub>  | 1.401             | 1.401                    | 1.422           | 1.410                    | 1.431             | 1.397                    | 1.401             | 1.400                    | 1.422           | 1.406                    | 1.430             | 1.395                    |
| C <sub>10</sub> -C <sub>11</sub> | 1.386             | 1.376                    | 1.370           | 1.381                    | 1.364             | 1.399                    | 1.386             | 1.376                    | 1.370           | 1.387                    | 1.365             | 1.403                    |
| C <sub>11</sub> -C <sub>4</sub>  | 1.408             | 1.413                    | 1.426           | 1.407                    | 1.433             | 1.393                    | 1.408             | 1.412                    | 1.426           | 1.402                    | 1.432             | 1.392                    |
| C <sub>5</sub> -O <sub>6</sub>   | 1.348             | 1.340                    | 1.273           | 1.267                    | 1.252             | 1.258                    | 1.348             | 1.341                    | 1.273           | 1.267                    | 1.254             | 1.259                    |
| O <sub>6</sub> -H <sub>7</sub>   | 0.997             | 1.003                    | 1.731           | 1.748                    | ----              | ----                     | 0.999             | 1.001                    | 1.731           | 1.756                    | ----              | ----                     |
| N <sub>2</sub> -H <sub>7</sub>   | 1.722             | 1.667                    | 1.039           | 1.037                    | 1.012             | 1.013                    | 1.711             | 1.678                    | 1.039           | 1.035                    | 1.013             | 1.013                    |
| $\phi_1$                         | -143.1            | 180.0                    | -163.6          | 180.0                    | -161.9            | -179.8                   | -21.87            | -15.86                   | -0.008          | 0.000                    | 0.001             | 0.000                    |
| $\phi_2$                         | -176.5            | 180.0                    | -178.5          | 180.0                    | -177.0            | -179.8                   | 178.9             | 174.1                    | 180.0           | -180.0                   | 180.0             | 180.0                    |
| $\phi_3$                         | 0.331             | -0.001                   | 0.050           | 0.001                    | -177.6            | -179.9                   | -0.191            | 0.344                    | -0.003          | 0.000                    | -180.0            | -180.0                   |
| <b>Methanol</b>                  |                   |                          |                 |                          |                   |                          |                   |                          |                 |                          |                   |                          |
|                                  | <i>trans-enol</i> |                          | <i>cis-keto</i> |                          | <i>trans-keto</i> |                          | <i>trans-enol</i> |                          | <i>cis-keto</i> |                          | <i>trans-keto</i> |                          |
| <b>Structural</b>                | <b>1'</b>         | <b>(1')S<sub>1</sub></b> | <b>2'</b>       | <b>(2')S<sub>1</sub></b> | <b>3'</b>         | <b>(3')S<sub>1</sub></b> | <b>4'</b>         | <b>(4')S<sub>1</sub></b> | <b>5'</b>       | <b>(5')S<sub>1</sub></b> | <b>6'</b>         | <b>(6')S<sub>1</sub></b> |

|                                  |                   |                          |                 |                          |                   |                          |                   |                          |                 |                          |                   |                          |
|----------------------------------|-------------------|--------------------------|-----------------|--------------------------|-------------------|--------------------------|-------------------|--------------------------|-----------------|--------------------------|-------------------|--------------------------|
| <b>parameters</b>                |                   |                          |                 |                          |                   |                          |                   |                          |                 |                          |                   |                          |
| C <sub>1</sub> -N <sub>2</sub>   | 1.407             | 1.350                    | 1.410           | 1.355                    | 1.414             | 1.377                    | 1.406             | 1.355                    | 1.408           | 1.358                    | 1.412             | 1.379                    |
| N <sub>2</sub> -C <sub>3</sub>   | 1.290             | 1.327                    | 1.325           | 1.352                    | 1.334             | 1.345                    | 1.291             | 1.318                    | 1.325           | 1.351                    | 1.333             | 1.346                    |
| C <sub>3</sub> -C <sub>4</sub>   | 1.451             | 1.425                    | 1.402           | 1.411                    | 1.390             | 1.417                    | 1.451             | 1.427                    | 1.404           | 1.414                    | 1.392             | 1.418                    |
| C <sub>4</sub> -C <sub>5</sub>   | 1.420             | 1.426                    | 1.462           | 1.473                    | 1.478             | 1.476                    | 1.420             | 1.425                    | 1.461           | 1.477                    | 1.477             | 1.477                    |
| C <sub>5</sub> -C <sub>8</sub>   | 1.399             | 1.392                    | 1.438           | 1.428                    | 1.453             | 1.424                    | 1.399             | 1.392                    | 1.437           | 1.426                    | 1.452             | 1.422                    |
| C <sub>8</sub> -C <sub>9</sub>   | 1.389             | 1.384                    | 1.372           | 1.374                    | 1.364             | 1.385                    | 1.389             | 1.384                    | 1.373           | 1.378                    | 1.365             | 1.389                    |
| C <sub>9</sub> -C <sub>10</sub>  | 1.401             | 1.401                    | 1.423           | 1.410                    | 1.431             | 1.397                    | 1.401             | 1.400                    | 1.422           | 1.406                    | 1.430             | 1.395                    |
| C <sub>10</sub> -C <sub>11</sub> | 1.386             | 1.376                    | 1.369           | 1.381                    | 1.364             | 1.399                    | 1.386             | 1.376                    | 1.370           | 1.387                    | 1.365             | 1.403                    |
| C <sub>11</sub> -C <sub>4</sub>  | 1.408             | 1.413                    | 1.427           | 1.407                    | 1.433             | 1.393                    | 1.408             | 1.412                    | 1.426           | 1.402                    | 1.432             | 1.391                    |
| C <sub>5</sub> -O <sub>6</sub>   | 1.348             | 1.340                    | 1.272           | 1.267                    | 1.252             | 1.258                    | 1.348             | 1.341                    | 1.273           | 1.267                    | 1.253             | 1.259                    |
| O <sub>6</sub> -H <sub>7</sub>   | 0.997             | 1.003                    | 1.739           | 1.748                    | ----              | ----                     | 0.999             | 1.001                    | 1.731           | 1.756                    | ----              | ----                     |
| N <sub>2</sub> -H <sub>7</sub>   | 1.722             | 1.667                    | 1.038           | 1.037                    | 1.013             | 1.013                    | 1.711             | 1.678                    | 1.039           | 1.035                    | 1.013             | 1.013                    |
| φ <sub>1</sub>                   | -143.1            | 180.0                    | -163.6          | 180.0                    | -161.8            | -179.8                   | -21.87            | -15.86                   | -0.012          | 0.000                    | 0.001             | 0.001                    |
| φ <sub>2</sub>                   | -176.5            | 180.0                    | -178.6          | 180.0                    | -177.0            | -179.8                   | 178.9             | 174.1                    | -180.0          | -180.0                   | 180.0             | -180.0                   |
| φ <sub>3</sub>                   | 0.331             | 0.000                    | 0.054           | 0.001                    | -177.5            | -179.9                   | -0.191            | 0.344                    | 0.001           | 0.000                    | -180.0            | 180.0                    |
| <b>Cyclohexane</b>               |                   |                          |                 |                          |                   |                          |                   |                          |                 |                          |                   |                          |
|                                  | <i>trans-enol</i> |                          | <i>cis-keto</i> |                          | <i>trans-keto</i> |                          | <i>trans-enol</i> |                          | <i>cis-keto</i> |                          | <i>trans-keto</i> |                          |
| <b>Structural parameters</b>     | <b>1'</b>         | <b>(1')S<sub>1</sub></b> | <b>2'</b>       | <b>(2')S<sub>1</sub></b> | <b>3'</b>         | <b>(3')S<sub>1</sub></b> | <b>4'</b>         | <b>(4')S<sub>1</sub></b> | <b>5'</b>       | <b>(5')S<sub>1</sub></b> | <b>6'</b>         | <b>(6')S<sub>1</sub></b> |
| C <sub>1</sub> -N <sub>2</sub>   | 1.407             | 1.357                    | 1.407           | 1.362                    | 1.411             | 1.386                    | 1.406             | 1.378                    | 1.405           | 1.366                    | 1.40948           | 1.38814                  |
| N <sub>2</sub> -C <sub>3</sub>   | 1.289             | 1.319                    | 1.329           | 1.346                    | 1.342             | 1.339                    | 1.291             | 1.295                    | 1.328           | 1.344                    | 1.34130           | 1.33999                  |
| C <sub>3</sub> -C <sub>4</sub>   | 1.450             | 1.429                    | 1.398           | 1.416                    | 1.382             | 1.420                    | 1.450             | 1.440                    | 1.400           | 1.421                    | 1.38340           | 1.42156                  |
| C <sub>4</sub> -C <sub>5</sub>   | 1.420             | 1.423                    | 1.467           | 1.473                    | 1.486             | 1.472                    | 1.421             | 1.416                    | 1.466           | 1.474                    | 1.48514           | 1.47176                  |
| C <sub>5</sub> -C <sub>8</sub>   | 1.400             | 1.393                    | 1.441           | 1.430                    | 1.459             | 1.422                    | 1.400             | 1.394                    | 1.440           | 1.426                    | 1.45816           | 1.41856                  |
| C <sub>8</sub> -C <sub>9</sub>   | 1.388             | 1.383                    | 1.369           | 1.376                    | 1.360             | 1.390                    | 1.388             | 1.382                    | 1.369           | 1.383                    | 1.36038           | 1.39498                  |
| C <sub>9</sub> -C <sub>10</sub>  | 1.401             | 1.400                    | 1.426           | 1.405                    | 1.436             | 1.391                    | 1.401             | 1.397                    | 1.425           | 1.398                    | 1.43508           | 1.38723                  |
| C <sub>10</sub> -C <sub>11</sub> | 1.385             | 1.376                    | 1.367           | 1.388                    | 1.361             | 1.406                    | 1.385             | 1.378                    | 1.368           | 1.398                    | 1.36153           | 1.41121                  |
| C <sub>11</sub> -C <sub>4</sub>  | 1.408             | 1.410                    | 1.428           | 1.399                    | 1.435             | 1.387                    | 1.408             | 1.405                    | 1.427           | 1.392                    | 1.43457           | 1.38465                  |
| C <sub>5</sub> -O <sub>6</sub>   | 1.344             | 1.337                    | 1.265           | 1.263                    | 1.242             | 1.255                    | 1.344             | 1.339                    | 1.266           | 1.264                    | 1.24248           | 1.25746                  |
| O <sub>6</sub> -H <sub>7</sub>   | 0.994             | 0.999                    | 1.708           | 1.718                    | ----              | ----                     | 0.996             | 0.992                    | 1.697           | 1.726                    | ----              | ----                     |
| N <sub>2</sub> -H <sub>7</sub>   | 1.740             | 1.689                    | 1.041           | 1.042                    | 1.011             | 1.012                    | 1.729             | 1.725                    | 1.044           | 1.040                    | 1.01192           | 1.01242                  |
| φ <sub>1</sub>                   | -141.8            | 180.0                    | -165.2          | 180.0                    | -167.8            | -179.8                   | -23.84            | -31.41                   | 0.017           | 0.001                    | 0.000             | 0.005                    |
| φ <sub>2</sub>                   | -176.4            | 180.0                    | -178.5          | 180.0                    | -177.1            | -179.9                   | 178.7             | 174.5                    | 180.0           | -180.0                   | 180.0             | -179.999                 |
| φ <sub>3</sub>                   | 0.576             | -0.004                   | -0.051          | -0.003                   | -178.1            | -179.9                   | -0.305            | 0.285                    | 0.000           | 0.002                    | -180.0            | -179.989                 |

**Table S2** Excitation energies (eV), oscillator strengths  $f$  and largest excitation coefficients for the *trans-enol*, *cis-keto* and *trans-keto* forms of 1-AntSA and 2-AntSA in **A** methanol and **B** cyclohexane computed at the PCM/TD/CAM-B3LYP/6-311+G(d,p) level of theory.

|                                                    | 1-AntSA        |            |             |        |        | 2-AntSA        |            |             |        |        |
|----------------------------------------------------|----------------|------------|-------------|--------|--------|----------------|------------|-------------|--------|--------|
| A. Methanol                                        |                |            |             |        |        |                |            |             |        |        |
| Compound                                           | State          | Transition | Coefficient | Energy | $f$    | State          | Transition | Coefficient | Energy | $f$    |
| <b>1 (1')<sup>a</sup></b><br>( <i>trans-enol</i> ) | S <sub>1</sub> | 78 → 79    | 0.68        | 3.28   | 0.3832 | S <sub>1</sub> | 78 → 79    | 0.67        | 3.35   | 0.1892 |
|                                                    | S <sub>2</sub> | 78 → 80    | 0.59        | 3.88   | 0.1329 | S <sub>2</sub> | 78 → 80    | 0.49        | 3.83   | 0.0987 |
|                                                    | S <sub>3</sub> | 78 → 81    | 0.47        | 3.99   | 0.0070 | S <sub>3</sub> | 77 → 79    | 0.56        | 3.93   | 1.0273 |
| <b>2 (2')</b><br>( <i>cis-keto</i> )               | S <sub>1</sub> | 78 → 79    | 0.64        | 3.05   | 0.5349 | S <sub>1</sub> | 78 → 79    | 0.61        | 3.03   | 0.6728 |
|                                                    | S <sub>2</sub> | 77 → 79    | 0.53        | 3.45   | 0.0181 | S <sub>2</sub> | 77 → 79    | 0.54        | 3.41   | 0.1128 |
|                                                    | S <sub>3</sub> | 74 → 79    | 0.47        | 3.88   | 0.0077 | S <sub>3</sub> | 78 → 80    | 0.47        | 3.77   | 0.0162 |
| <b>3 (3')</b><br>( <i>trans-keto</i> )             | S <sub>1</sub> | 78 → 79    | 0.62        | 2.93   | 0.6470 | S <sub>1</sub> | 78 → 79    | 0.60        | 2.87   | 0.6288 |
|                                                    | S <sub>2</sub> | 77 → 79    | 0.48        | 3.42   | 0.0390 | S <sub>2</sub> | 77 → 79    | 0.49        | 3.39   | 0.1608 |
|                                                    | S <sub>3</sub> | 75 → 79    | 0.59        | 3.63   | 0.0008 | S <sub>3</sub> | 75 → 79    | 0.63        | 3.59   | 0.0014 |
| <b>4 (4')</b><br>( <i>trans-enol</i> )             | S <sub>1</sub> | 78 → 79    | 0.69        | 3.36   | 0.2280 | S <sub>1</sub> | 78 → 79    | 0.67        | 3.34   | 0.3284 |
|                                                    | S <sub>2</sub> | 78 → 80    | 0.63        | 3.78   | 0.0203 | S <sub>2</sub> | 78 → 80    | 0.59        | 3.71   | 0.3260 |
|                                                    | S <sub>3</sub> | 78 → 81    | 0.52        | 3.99   | 0.0122 | S <sub>3</sub> | 77 → 79    | 0.61        | 3.92   | 0.8862 |
| <b>5 (5')</b><br>( <i>cis-keto</i> )               | S <sub>1</sub> | 78 → 79    | 0.61        | 3.22   | 0.4963 | S <sub>1</sub> | 78 → 79    | 0.61        | 3.06   | 0.6930 |
|                                                    | S <sub>2</sub> | 77 → 79    | 0.47        | 3.48   | 0.0231 | S <sub>2</sub> | 78 → 80    | 0.53        | 3.47   | 0.2035 |
|                                                    | S <sub>3</sub> | 78 → 80    | 0.39        | 3.83   | 0.0047 | S <sub>3</sub> | 77 → 79    | 0.42        | 3.70   | 0.0430 |
| <b>6 (6')</b><br>( <i>trans-keto</i> )             | S <sub>1</sub> | 78 → 79    | 0.55        | 3.06   | 0.4641 | S <sub>1</sub> | 78 → 79    | 0.60        | 2.90   | 0.9012 |
|                                                    | S <sub>2</sub> | 78 → 80    | 0.49        | 3.43   | 0.0586 | S <sub>2</sub> | 78 → 80    | 0.56        | 3.42   | 0.0684 |
|                                                    | S <sub>3</sub> | 75 → 79    | 0.59        | 3.67   | 0.0001 | S <sub>3</sub> | 75 → 79    | 0.64        | 3.62   | 0.0001 |
| A. Cyclohexane                                     |                |            |             |        |        |                |            |             |        |        |
| <b>1 (1')</b><br>( <i>trans-enol</i> )             | S <sub>1</sub> | 78 → 79    | 0.68        | 3.26   | 0.4054 | S <sub>1</sub> | 78 → 79    | 0.67        | 3.34   | 0.2039 |
|                                                    | S <sub>2</sub> | 78 → 80    | 0.58        | 3.85   | 0.1233 | S <sub>2</sub> | 78 → 80    | 0.52        | 3.83   | 0.1621 |
|                                                    | S <sub>3</sub> | 78 → 81    | 0.48        | 3.98   | 0.0048 | S <sub>3</sub> | 77 → 79    | 0.57        | 3.89   | 0.9548 |
| <b>2 (2')</b><br>( <i>cis-keto</i> )               | S <sub>1</sub> | 78 → 79    | 0.64        | 2.99   | 0.5558 | S <sub>1</sub> | 78 → 79    | 0.63        | 2.98   | 0.7245 |
|                                                    | S <sub>2</sub> | 77 → 79    | 0.55        | 3.41   | 0.0215 | S <sub>2</sub> | 77 → 79    | 0.56        | 3.40   | 0.0960 |
|                                                    | S <sub>3</sub> | 74 → 79    | 0.51        | 3.75   | 0.0011 | S <sub>3</sub> | 75 → 79    | 0.59        | 3.71   | 0.0061 |
| <b>3 (3')</b><br>( <i>trans-keto</i> )             | S <sub>1</sub> | 78 → 79    | 0.63        | 2.88   | 0.6742 | S <sub>1</sub> | 78 → 79    | 0.62        | 2.84   | 0.6483 |
|                                                    | S <sub>2</sub> | 77 → 79    | 0.43        | 3.40   | 0.0295 | S <sub>2</sub> | 77 → 79    | 0.45        | 3.38   | 0.1459 |
|                                                    | S <sub>3</sub> | 76 → 79    | 0.49        | 3.42   | 0.0074 | S <sub>3</sub> | 75 → 79    | 0.56        | 3.39   | 0.0379 |
| <b>4 (4')</b><br>( <i>trans-enol</i> )             | S <sub>1</sub> | 78 → 79    | 0.69        | 3.35   | 0.2482 | S <sub>1</sub> | 78 → 79    | 0.67        | 3.32   | 0.3549 |
|                                                    | S <sub>2</sub> | 78 → 80    | 0.63        | 3.75   | 0.0218 | S <sub>2</sub> | 78 → 80    | 0.60        | 3.70   | 0.4262 |
|                                                    | S <sub>3</sub> | 78 → 81    | 0.52        | 3.98   | 0.0101 | S <sub>3</sub> | 77 → 79    | 0.60        | 3.89   | 0.7539 |
| <b>5 (5')</b><br>( <i>cis-keto</i> )               | S <sub>1</sub> | 78 → 79    | 0.60        | 3.18   | 0.5275 | S <sub>1</sub> | 78 → 79    | 0.62        | 3.00   | 0.7227 |
|                                                    | S <sub>2</sub> | 77 → 79    | 0.49        | 3.46   | 0.0211 | S <sub>2</sub> | 78 → 80    | 0.54        | 3.44   | 0.1973 |
|                                                    | S <sub>3</sub> | 75 → 80    | 0.38        | 3.75   | 0.0014 | S <sub>3</sub> | 77 → 79    | 0.46        | 3.70   | 0.0465 |
| <b>6 (6')</b><br>( <i>trans-keto</i> )             | S <sub>1</sub> | 78 → 79    | 0.58        | 3.01   | 0.5053 | S <sub>1</sub> | 78 → 79    | 0.61        | 2.90   | 0.9040 |
|                                                    | S <sub>2</sub> | 78 → 80    | 0.45        | 3.41   | 0.0537 | S <sub>2</sub> | 78 → 80    | 0.56        | 3.39   | 0.0750 |
|                                                    | S <sub>3</sub> | 76 → 79    | 0.53        | 3.46   | 0.0002 | S <sub>3</sub> | 75 → 79    | 0.62        | 3.43   | 0.0001 |

<sup>a</sup> The number in parenthesis corresponds to the conformers of 2-AntSA (right columns).

**Table S3.** TD-DFT first excited states relative energies (RE, kcal/mol), intramolecular hydrogen bond (IMHB, Å) and torsional angles ( $\phi_i$ , degrees) of the *trans*-enol ((**1**) $S_1$ , (**1'**) $S_1$ ), twisted-enol ((**1**) $S_{1-Tw}$ , (**1'**) $S_{1-Tw}$ ), *cis*-keto ((**2**) $S_1$ , (**2'**) $S_1$ ), twisted-keto ((**2**) $S_{1-Tw}$ , (**2'**) $S_{1-Tw}$ ) and *trans*-keto ((**3**) $S_1$ , (**3'**) $S_1$ ) forms.

| 1-AntSA <sup>a</sup>     |                                                                            |                                                                            |                                                                             |
|--------------------------|----------------------------------------------------------------------------|----------------------------------------------------------------------------|-----------------------------------------------------------------------------|
| Structure                | Acetonitrile                                                               | Methanol                                                                   | Cyclohexane                                                                 |
| ( <b>1</b> ) $S_1$       | RE: 0.04, IMHB: 1.68<br>$\phi_1$ : -11.9, $\phi_2$ : 173, $\phi_3$ : -1.87 | RE: 0.08, IMHB: 1.68<br>$\phi_1$ : -11.9, $\phi_2$ : 173, $\phi_3$ : -1.87 | RE: 6.38, IMHB: 1.69<br>$\phi_1$ : -13.9, $\phi_2$ : 173, $\phi_3$ : -2.48  |
| ( <b>1</b> ) $S_{1-Tw}$  | RE: 0.00, IMHB: 1.90<br>$\phi_1$ : 1.55, $\phi_2$ : 91.6, $\phi_3$ : 7.79  | RE: 0.00, IMHB: 1.91<br>$\phi_1$ : 1.54, $\phi_2$ : 91.6, $\phi_3$ : 7.78  | RE: 0.00, IMHB: 1.93<br>$\phi_1$ : 1.06, $\phi_2$ : 90.5, $\phi_3$ : 7.14   |
| ( <b>2</b> ) $S_1$       | RE: 0.00, IMHB: 1.68<br>$\phi_1$ : -0.02, $\phi_2$ : 180, $\phi_3$ : 0.00  | RE: 0.05, IMHB: 1.68<br>$\phi_1$ : -0.02, $\phi_2$ : 180, $\phi_3$ : 0.00  | RE: 7.88, IMHB: 1.64<br>$\phi_1$ : 0.00, $\phi_2$ : -180, $\phi_3$ : 0.00   |
| ( <b>2</b> ) $S_{1-Tw}$  | RE: 7.63<br>$\phi_1$ : 12.0, $\phi_2$ : -172, $\phi_3$ : -79.5             | RE: 7.62<br>$\phi_1$ : 12.0, $\phi_2$ : -172, $\phi_3$ : -79.5             | RE: 6.61<br>$\phi_1$ : 14.3, $\phi_2$ : -171, $\phi_3$ : -80.1              |
| ( <b>3</b> ) $S_1$       | RE: 5.08<br>$\phi_1$ : -9.55, $\phi_2$ : 175, $\phi_3$ : 175               | RE: 5.15<br>$\phi_1$ : -9.55, $\phi_2$ : 175, $\phi_3$ : 175               | RE: 15.7<br>$\phi_1$ : -14.0, $\phi_2$ : 173, $\phi_3$ : 173                |
| ( <b>4</b> ) $S_1$       | RE: 0.00, IMHB: 1.70<br>$\phi_1$ : -155, $\phi_2$ : -171, $\phi_3$ : 1.61  | RE: 0.00, IMHB: 1.70<br>$\phi_1$ : -155, $\phi_2$ : -172, $\phi_3$ : 1.63  | RE: 5.84, IMHB: 1.73<br>$\phi_1$ : -151, $\phi_2$ : -170, $\phi_3$ : 2.01   |
| ( <b>4</b> ) $S_{1-Tw}$  | RE: 0.21, IMHB: 1.91<br>$\phi_1$ : 179, $\phi_2$ : -96.3, $\phi_3$ : -5.38 | RE: 0.16, IMHB: 1.91<br>$\phi_1$ : 179, $\phi_2$ : -96.3, $\phi_3$ : -5.39 | RE: 0.00, IMHB: 1.93<br>$\phi_1$ : -179, $\phi_2$ : -95.6, $\phi_3$ : -4.39 |
| ( <b>5</b> ) $S_1$       | RE: 0.67, IMHB: 1.69<br>$\phi_1$ : -164, $\phi_2$ : 180, $\phi_3$ : 0.62   | RE: 0.68, IMHB: 1.69<br>$\phi_1$ : -164, $\phi_2$ : 180, $\phi_3$ : 0.61   | RE: 8.45, IMHB: 1.65<br>$\phi_1$ : -162, $\phi_2$ : 179, $\phi_3$ : 0.22    |
| ( <b>5</b> ) $S_{1-Tw}$  | RE: 5.98<br>$\phi_1$ : -118, $\phi_2$ : -180, $\phi_3$ : 82.5              | RE: 5.92<br>$\phi_1$ : -118, $\phi_2$ : -180, $\phi_3$ : 82.6              | RE: 4.33<br>$\phi_1$ : -117, $\phi_2$ : -175, $\phi_3$ : 82.3               |
| ( <b>6</b> ) $S_1$       | RE: 4.61<br>$\phi_1$ : -156, $\phi_2$ : -175, $\phi_3$ : -171              | RE: 4.64<br>$\phi_1$ : -156, $\phi_2$ : -175, $\phi_3$ : -171              | RE: 14.6<br>$\phi_1$ : -153, $\phi_2$ : -176, $\phi_3$ : -171               |
| 2-AntSA <sup>a</sup>     |                                                                            |                                                                            |                                                                             |
| Structure                | Acetonitrile                                                               | Methanol                                                                   | Cyclohexane                                                                 |
| ( <b>1'</b> ) $S_1$      | RE: 1.21, IMHB: 1.67<br>$\phi_1$ : 180, $\phi_2$ : 180, $\phi_3$ : 0.00    | RE: 1.19, IMHB: 1.67<br>$\phi_1$ : 180, $\phi_2$ : 180, $\phi_3$ : 0.00    | RE: 7.15, IMHB: 1.69<br>$\phi_1$ : 180, $\phi_2$ : 180, $\phi_3$ : 0.00     |
| ( <b>1'</b> ) $S_{1-Tw}$ | RE: 0.21, IMHB: 1.90<br>$\phi_1$ : 178, $\phi_2$ : -91.2, $\phi_3$ : -8.28 | RE: 0.15, IMHB: 1.90<br>$\phi_1$ : 179, $\phi_2$ : -91.2, $\phi_3$ : -8.24 | RE: 0.00, IMHB: 1.92<br>$\phi_1$ : 179, $\phi_2$ : -90.4, $\phi_3$ : -8.11  |
| ( <b>2'</b> ) $S_1$      | RE: 0.00, IMHB: 1.75<br>$\phi_1$ : 180, $\phi_2$ : 180, $\phi_3$ : 0.00    | RE: 0.00, IMHB: 1.75<br>$\phi_1$ : 180, $\phi_2$ : 180, $\phi_3$ : 0.00    | RE: 7.79, IMHB: 1.72<br>$\phi_1$ : 180, $\phi_2$ : 180, $\phi_3$ : 0.00     |
| ( <b>2'</b> ) $S_{1-Tw}$ | RE: 4.93<br>$\phi_1$ : -177, $\phi_2$ : -178, $\phi_3$ : 86.5              | RE: 4.87<br>$\phi_1$ : -177, $\phi_2$ : -178, $\phi_3$ : 86.5              | RE: 3.42<br>$\phi_1$ : 173, $\phi_2$ : 177, $\phi_3$ : 81.6                 |
| ( <b>3'</b> ) $S_1$      | RE: 2.72<br>$\phi_1$ : -180, $\phi_2$ : -180, $\phi_3$ : -180              | RE: 2.74<br>$\phi_1$ : -180, $\phi_2$ : -180, $\phi_3$ : -180              | RE: 12.7<br>$\phi_1$ : -180, $\phi_2$ : -180, $\phi_3$ : -180               |
| ( <b>4'</b> ) $S_1$      | RE: 2.52, IMHB: 1.68<br>$\phi_1$ : -15.9, $\phi_2$ : 174, $\phi_3$ : 0.34  | RE: 2.51, IMHB: 1.68<br>$\phi_1$ : -15.8, $\phi_2$ : 174, $\phi_3$ : 0.34  | RE: 8.51, IMHB: 1.73<br>$\phi_1$ : -31.4, $\phi_2$ : 175, $\phi_3$ : 0.30   |

|                             |                                                                           |                                                                           |                                                                           |
|-----------------------------|---------------------------------------------------------------------------|---------------------------------------------------------------------------|---------------------------------------------------------------------------|
| <b>(4')S<sub>1-Tw</sub></b> | RE: 0.46, IMHB: 1.90<br>$\phi_1$ : 1.30, $\phi_2$ : 93.0, $\phi_3$ : 8.25 | RE: 0.40, IMHB: 1.90<br>$\phi_1$ : 1.29, $\phi_2$ : 93.0, $\phi_3$ : 8.24 | RE: 0.00, IMHB: 1.91<br>$\phi_1$ : 1.20, $\phi_2$ : 91.7, $\phi_3$ : 8.44 |
| <b>(5')S<sub>1</sub></b>    | RE: 0.00, IMHB: 1.76<br>$\phi_1$ : 0.00, $\phi_2$ : -180, $\phi_3$ : 0.00 | RE: 0.00, IMHB: 1.76<br>$\phi_1$ : 0.00, $\phi_2$ : -180, $\phi_3$ : 0.00 | RE: 7.54, IMHB: 1.73<br>$\phi_1$ : 0.00, $\phi_2$ : -180, $\phi_3$ : 0.00 |
| <b>(5')S<sub>1-Tw</sub></b> | RE: 4.91<br>$\phi_1$ : -9.82, $\phi_2$ : 177, $\phi_3$ : 82.0             | RE: 4.85<br>$\phi_1$ : -9.84, $\phi_2$ : 177, $\phi_3$ : 82.1             | RE: 3.41<br>$\phi_1$ : -14.5, $\phi_2$ : 178, $\phi_3$ : 80.8             |
| <b>(6')S<sub>1</sub></b>    | RE: 2.37<br>$\phi_1$ : 0.00, $\phi_2$ : 180, $\phi_3$ : -180              | RE: 2.40<br>$\phi_1$ : 0.00, $\phi_2$ : -180, $\phi_3$ : 180              | RE: 12.5<br>$\phi_1$ : 0.00, $\phi_2$ : -180, $\phi_3$ : -180             |

<sup>a</sup> Relative energies were calculated independently for conformers **1**, **4**, **1'** and **4'**, and their corresponding products using the most stable conformers as reference.
